# Supplementary material
Source: PubMed Central journal article supplement (PMC2755967)
Supplement: supp_M109.010868_jbc.M109.010868-1.pdf [file supp_M109.010868_jbc.M109.010868-1.pdf]

**Table S1**

Comparison of the kinetic parameters obtained for alternative mechanisms from fits of the data for H<sub>2</sub>S generation from cysteine by yCBS<sup>a</sup>

|                               | <b>Ping-pong</b> | <b>Random-sequential</b> | <b>Ordered-sequential</b>    |
|-------------------------------|------------------|--------------------------|------------------------------|
| <b>V<sub>max1</sub>, U/mg</b> | 3.7 ± 1.1        | 3.73 ± 1.35              | 3.57 ± 1.0                   |
| <b>K<sub>M1</sub>, mM</b>     | 3.6 ± 1.7        | 3.6 ± 1.8                | 3.4 ± 1.7                    |
| <b>V<sub>max2</sub>, U/mg</b> | 9.0 ± 1.3        | 9.3 ± 1.4                | 9.1 ± 1.5                    |
| <b>K<sub>M2</sub>, mM</b>     | 33.0 ± 3.8       | 32.2 ± 4.4               | 33.1 ± 4.2                   |
| <b>K<sub>d</sub>, mM</b>      | ---              | ----                     | 2.3 × 10 <sup>-9</sup> ± 3.6 |
| <b>n</b>                      | 2.4 ± 0.5        | 2.2 ± 0.5                | 2.4 ± 0.6                    |
| <b>R<sup>2</sup></b>          | 0.995            | 0.995                    | 0.995                        |

<sup>a</sup> The fits are for the experimental data (open circles) shown in Fig. 3A and the values are reported as mean ±SD.

**Table S2**Kinetic parameters obtained for H<sub>2</sub>S generation from cysteine and homocysteine for hCBS and yCBS<sup>a</sup>

|                               | <b>hCBS</b> | <b>yCBS</b> |
|-------------------------------|-------------|-------------|
| <b>V<sub>max3</sub>, U/mg</b> | 18.7 ± 2.6  | 60 ± 2.4    |
| <b>K<sub>M3</sub>, mM</b>     | 3.2 ± 1.3   | 0.13 ± 0.02 |
| <b>n</b>                      | 0.74 ± 0.1  | 0.9 ± 0.1   |
| <b>R<sup>2</sup></b>          | 0.992       | 0.985       |

<sup>a</sup> The fits are for the experimental data (open circles) shown in Figs. 3B and 4C for yCBS and hCBS respectively. The values are reported as mean ± SD. For both hCBS and yCBS, reasonable fits were only obtained for the ping-pong mechanism but not sequential (random or ordered binding) mechanism. The values of V<sub>max1</sub>, V<sub>max2</sub>, K<sub>m1</sub>, K<sub>m2</sub> from Table 1 were used as an input parameters.

**Table S3**

Comparison of the kinetic parameters obtained for alternative mechanisms for fitting the data for H<sub>2</sub>S generation by hCBS from cysteine<sup>a</sup>

|                               | <b>Ping-Pong</b>       | <b>Random-Sequential</b> | <b>Ordered-Sequential</b> |
|-------------------------------|------------------------|--------------------------|---------------------------|
| <b>V<sub>max1</sub>, U/mg</b> | 0.46 ± 0.08            | 0.52 ± 0.04              | 0.48 ± 0.52               |
| <b>K<sub>M1</sub>, mM</b>     | <sup>b</sup> 6.8 ± 1.7 | <sup>b</sup> 6.8 ± 1.7   | <sup>b</sup> 6.8 ± 1.7    |
| <b>V<sub>max2</sub>, U/mg</b> | 0.82 ± 0.08            | 0.88 ± 0.10              | 0.82 ± 0.14               |
| <b>K<sub>M2</sub>, mM</b>     | 27.3 ± 3.73            | 29.6 ± 10.2              | 27.9 ± 16.8               |
| <b>K<sub>i</sub></b>          | K <sub>M2</sub>        | K <sub>M2</sub>          | K <sub>M2</sub>           |
| <b>K<sub>d</sub>, mM</b>      | -                      | -                        | 0.51 ± 14.41              |
| <b>n</b>                      | 1.33 ± 0.25            | 1.09 ± 0.18              | 1.33 ± 0.27               |
| <b>R<sup>2</sup></b>          | 0.9992                 | 0.9992                   | 0.9996                    |

<sup>a</sup>The fits are for the experimental data (open circle) shown in Fig. 4B and the values are reported as mean ±SD. <sup>b</sup>The value for K<sub>M1</sub> was used as an input parameter from the HPLC analysis (Table 1).
